# Supplementary material for: Synthesis and Characterization of N-Nitrososydnonimine as NO. Donor
Source: Preprints.org preprint supplement (doi:10.20944/preprints202409.0838.v1), 2024-09-10
Supplement: Supplementary file 1 [file supplementary]

SUPPLEMENTARY INFORMATION

**Synthesis and characterization of *N*-Nitrososydnonimine as NO. donor**

Nathalie Saffon-Merceron,a Christian Lherbetb and Pascal Hoffmannb,*

*a* Institut de Chimie de Toulouse, Université Toulouse 3 Paul Sabatier, ICT-UAR CNRS 2599, 118 route de Narbonne, 31062 Toulouse cedex 9, France. [*nathalie.saffon@univ-tlse3.fr*](mailto:nathalie.saffon@univ-tlse3.fr)

*bLSPCMIB, Université Toulouse 3 Paul Sabatier, UMR CNRS UPS 5068, 118 route de Narbonne, 31062 Toulouse cedex 9, France.* [*christian.lherbet@univ-tlse3.fr*](mailto:christian.lherbet@univ-tlse3.fr)*;* [*pascal.hoffmann@univ-tlse3.fr*](mailto:pascal.hoffmann@univ-tlse3.fr)

**SI-2 Figure S1** (1H-NMR spectrum of compound **3**)and **Figure S2 (**13C-NMR spectrum of compound **3**)

**SI-3****Figure S3 (**HRMS of compound **3**)

**SI-4-9**Crystallography Data for compound **3 (Tables S1-S6)**

**Figure S1.** 1H-NMR spectrum of compound **3**

**Figure S2.** 13C-NMR spectrum of compound **3**

**Figure S3.** HRMS of compound **3**

**Crystallography Data for compound 3**

The data were collected at low temperature using an oil-coated shock-cooled crystal on a Bruker-AXS CCD 1000 diffractometer with MoK radiation (λ = 0.71073 Å). The structure was solved by direct methods (SHELXS-97, G. M. Sheldrick, *Acta Crystallogr.* **1990**, *A46*, 467-473) and all non-hydrogen atoms were refined anisotropically using the least-squares method on F2 (SHELXL, G. M. Sheldrick, *Acta Crystallogr. Sect. C*, **2015**, *71*, 3-8). CCDC-2381843 contains the supplementary crystallographic data for this paper. These data can be obtained free of charge from the Cambridge Crystallographic Data Centre via <https://www.ccdc.cam.ac.uk/structures/>.


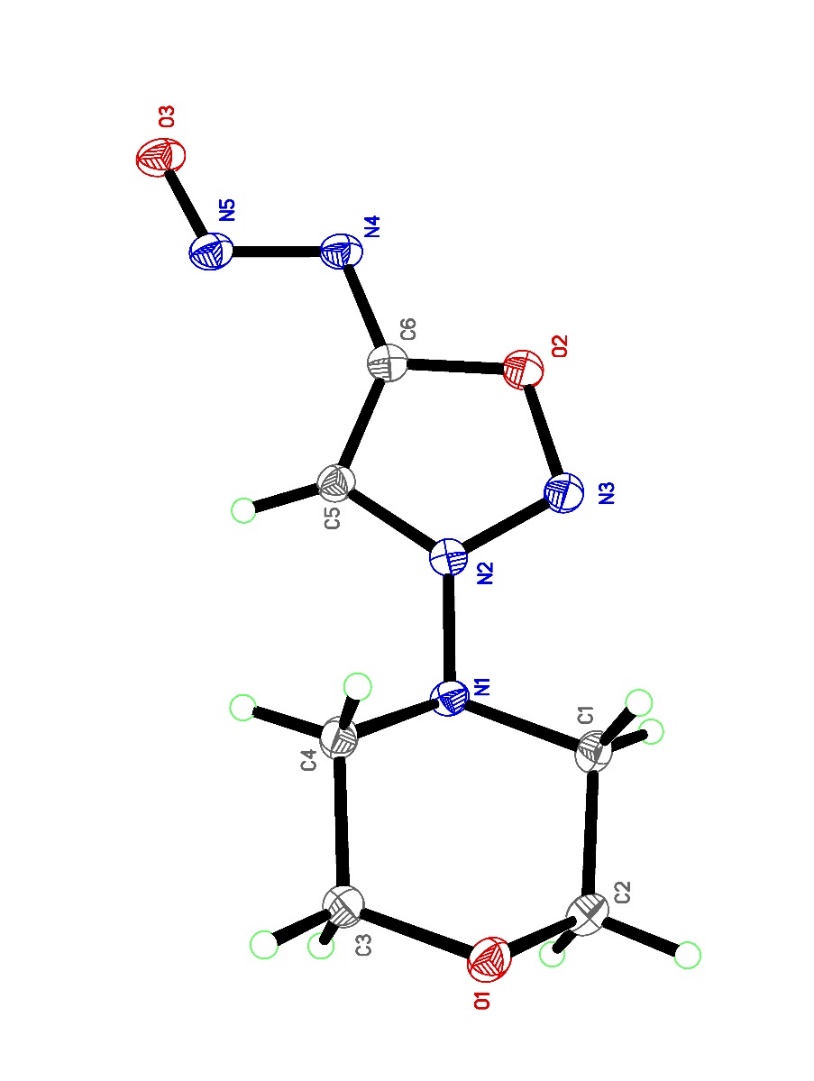


**Table S1.** Crystal data and structure refinement for compound **3**.

Identification code **3**

Empirical formula C6 H9 N5 O3

Formula weight 199.18

Temperature 193(2) K

Wavelength 0.71073 Å

Crystal system Monoclinic

Space group P2**1**/n

Unit cell dimensions a = 6.5948(6) Å = 90°.

b = 11.4509(8) Å = 97.631(2)°.

c = 11.0775(11) Å  = 90°.

Volume 829.12(13) Å3

Z 4

Density (calculated) 1.596 Mg/m3

Absorption coefficient 0.130 mm-1

F(000) 416

Crystal size 0.300 x 0.220 x 0.160 mm3

Theta range for data collection 2.570 to 26.339°.

Index ranges -8<=h<=8, -14<=k<=14, -13<=l<=8

Reflections collected 4800

Independent reflections 1692 [R(int) = 0.0267]

Completeness to theta = 25.242° 100.0 %

Absorption correction Semi-empirical from equivalents

Max. and min. transmission 0.9854 and 0.9298

Refinement method Full-matrix least-squares on F2

Data / restraints / parameters 1692 / 0 / 127

Goodness-of-fit on F2 1.058

Final R indices [I>2sigma(I)] R1 = 0.0355, wR2 = 0.0915

R indices (all data) R1 = 0.0416, wR2 = 0.0955

Extinction coefficient n/a

Largest diff. peak and hole 0.207 and -0.297 e.Å-3

**Table S2.** Atomic coordinates ( x 104) and equivalent isotropic displacement parameters (Å2x 103)

for CA19PTM. U(eq) is defined as one third of the trace of the orthogonalized Uij tensor.

________________________________________________________________________________

x y z U(eq)

________________________________________________________________________________

O(1) 2524(1) 5683(1) 4729(1) 28(1)

O(2) 295(2) 9886(1) 7586(1) 31(1)

O(3) -5906(2) 11404(1) 6707(1) 36(1)

N(1) 1210(2) 7907(1) 5389(1) 23(1)

N(2) 388(2) 8694(1) 6146(1) 22(1)

N(3) 1496(2) 9045(1) 7142(1) 29(1)

N(4) -2812(2) 10803(1) 7193(1) 28(1)

N(5) -4591(2) 10674(1) 6492(1) 30(1)

C(1) 3199(2) 7435(1) 5953(1) 25(1)

C(2) 3974(2) 6588(1) 5068(1) 26(1)

C(3) 694(2) 6182(1) 4121(1) 28(1)

C(4) -301(2) 6985(1) 4955(1) 25(1)

C(5) -1468(2) 9224(1) 5898(1) 24(1)

C(6) -1512(2) 9993(1) 6846(1) 25(1)

________________________________________________________________________________  **Table S3.** Bond lengths [Å] and angles [°] for CA19PTM.

_____________________________________________________

O(1)-C(3) 1.4218(16)

O(1)-C(2) 1.4267(16)

O(2)-C(6) 1.3593(17)

O(2)-N(3) 1.3784(14)

O(3)-N(5) 1.2497(15)

N(1)-N(2) 1.3892(15)

N(1)-C(1) 1.4791(16)

N(1)-C(4) 1.4872(16)

N(2)-N(3) 1.3031(15)

N(2)-C(5) 1.3610(16)

N(4)-N(5) 1.3263(17)

N(4)-C(6) 1.3531(17)

C(1)-C(2) 1.5148(18)

C(1)-H(1A) 0.9900

C(1)-H(1B) 0.9900

C(2)-H(2A) 0.9900

C(2)-H(2B) 0.9900

C(3)-C(4) 1.5132(18)

C(3)-H(3A) 0.9900

C(3)-H(3B) 0.9900

C(4)-H(4A) 0.9900

C(4)-H(4B) 0.9900

C(5)-C(6) 1.3736(18)

C(5)-H(5) 0.9500

C(3)-O(1)-C(2) 109.21(10)

C(6)-O(2)-N(3) 110.31(10)

N(2)-N(1)-C(1) 112.17(9)

N(2)-N(1)-C(4) 110.97(10)

C(1)-N(1)-C(4) 113.27(10)

N(3)-N(2)-C(5) 114.94(11)

N(3)-N(2)-N(1) 119.43(10)

C(5)-N(2)-N(1) 125.43(10)

N(2)-N(3)-O(2) 103.49(10)

N(5)-N(4)-C(6) 107.57(11)

O(3)-N(5)-N(4) 113.35(11)

N(1)-C(1)-C(2) 108.47(10)

N(1)-C(1)-H(1A) 110.0

C(2)-C(1)-H(1A) 110.0

N(1)-C(1)-H(1B) 110.0

C(2)-C(1)-H(1B) 110.0

H(1A)-C(1)-H(1B) 108.4

O(1)-C(2)-C(1) 111.31(10)

O(1)-C(2)-H(2A) 109.4

C(1)-C(2)-H(2A) 109.4

O(1)-C(2)-H(2B) 109.4

C(1)-C(2)-H(2B) 109.4

H(2A)-C(2)-H(2B) 108.0

O(1)-C(3)-C(4) 111.36(11)

O(1)-C(3)-H(3A) 109.4

C(4)-C(3)-H(3A) 109.4

O(1)-C(3)-H(3B) 109.4

C(4)-C(3)-H(3B) 109.4

H(3A)-C(3)-H(3B) 108.0

N(1)-C(4)-C(3) 107.62(11)

N(1)-C(4)-H(4A) 110.2

C(3)-C(4)-H(4A) 110.2

N(1)-C(4)-H(4B) 110.2

C(3)-C(4)-H(4B) 110.2

H(4A)-C(4)-H(4B) 108.5

N(2)-C(5)-C(6) 103.96(11)

N(2)-C(5)-H(5) 128.0

C(6)-C(5)-H(5) 128.0

N(4)-C(6)-O(2) 115.36(11)

N(4)-C(6)-C(5) 137.32(13)

O(2)-C(6)-C(5) 107.29(11)

_____________________________________________________________

Symmetry transformations used to generate equivalent atoms:

**Table S4.** Anisotropic displacement parameters (Å2x 103) for CA19PTM. The anisotropic

displacement factor exponent takes the form: -22[ h2 a*2U11 + ... + 2 h k a* b* U12 ]

______________________________________________________________________________

U11 U22 U33 U23 U13 U12

______________________________________________________________________________

O(1) 25(1) 24(1) 34(1) -1(1) 2(1) 4(1)

O(2) 30(1) 31(1) 32(1) -9(1) 2(1) 3(1)

O(3) 38(1) 36(1) 35(1) 4(1) 11(1) 15(1)

N(1) 22(1) 21(1) 25(1) -1(1) 5(1) 2(1)

N(2) 23(1) 21(1) 23(1) 1(1) 4(1) -1(1)

N(3) 26(1) 29(1) 31(1) -7(1) 1(1) 2(1)

N(4) 32(1) 26(1) 27(1) 0(1) 7(1) 5(1)

N(5) 32(1) 31(1) 29(1) 3(1) 8(1) 7(1)

C(1) 20(1) 26(1) 29(1) 0(1) 2(1) 0(1)

C(2) 22(1) 26(1) 32(1) 2(1) 6(1) 2(1)

C(3) 28(1) 27(1) 28(1) -4(1) -1(1) 6(1)

C(4) 22(1) 24(1) 29(1) -2(1) -1(1) 2(1)

C(5) 24(1) 23(1) 25(1) 1(1) 3(1) 2(1)

C(6) 28(1) 22(1) 25(1) 3(1) 6(1) -1(1)

______________________________________________________________________________ **Table S5.** Hydrogen coordinates ( x 104) and isotropic displacement parameters (Å2x 10 3)

for CA19PTM.

________________________________________________________________________________

x y z U(eq)

________________________________________________________________________________

H(1A) 3032 7028 6722 30

H(1B) 4193 8078 6142 30

H(2A) 4246 7017 4330 32

H(2B) 5277 6239 5448 32

H(3A) -273 5551 3827 34

H(3B) 1012 6628 3404 34

H(4A) -1549 7341 4509 30

H(4B) -692 6540 5655 30

H(5) -2495 9092 5226 29

________________________________________________________________________________ **Table S6.** Torsion angles [°] for CA19PTM.

________________________________________________________________

C(1)-N(1)-N(2)-N(3) 8.96(15)

C(4)-N(1)-N(2)-N(3) 136.77(11)

C(1)-N(1)-N(2)-C(5) -176.52(11)

C(4)-N(1)-N(2)-C(5) -48.71(15)

C(5)-N(2)-N(3)-O(2) -0.87(14)

N(1)-N(2)-N(3)-O(2) 174.21(10)

C(6)-O(2)-N(3)-N(2) 1.17(14)

C(6)-N(4)-N(5)-O(3) -178.02(11)

N(2)-N(1)-C(1)-C(2) 179.95(10)

C(4)-N(1)-C(1)-C(2) 53.37(13)

C(3)-O(1)-C(2)-C(1) 62.40(13)

N(1)-C(1)-C(2)-O(1) -56.63(14)

C(2)-O(1)-C(3)-C(4) -63.52(14)

N(2)-N(1)-C(4)-C(3) 178.89(9)

C(1)-N(1)-C(4)-C(3) -53.89(13)

O(1)-C(3)-C(4)-N(1) 58.22(14)

N(3)-N(2)-C(5)-C(6) 0.25(15)

N(1)-N(2)-C(5)-C(6) -174.49(11)

N(5)-N(4)-C(6)-O(2) -170.76(11)

N(5)-N(4)-C(6)-C(5) 11.2(2)

N(3)-O(2)-C(6)-N(4) -179.64(10)

N(3)-O(2)-C(6)-C(5) -1.07(14)

N(2)-C(5)-C(6)-N(4) 178.61(15)

N(2)-C(5)-C(6)-O(2) 0.51(14)

________________________________________________________________

Symmetry transformations used to generate equivalent atoms:
